# Supplementary material for: Ellagic Acid Supplementation Ameliorates Cisplatin-Induced Liver Injury in Mice via the Activation of Nrf2/HO-1 Pathway and the Inhibition of NF-kB Pathway
Source: Preprints.org preprint supplement (doi:10.20944/preprints202310.0025.v1), 2023-10-02
Supplement: Supplementary file 1 [file supplementary]

Supplementary materials

Ellagic Acid Supplementation Ameliorates Cisplatin-Induced Liver Injury in Mice Through Inhibiting NF-kB Pathway and activating Nrf2/HO-1 Pathway

Xueyong Zhang 1,2, Mingchao Liu 3, Yue Liu 1, 2, Qiang Ma1,2 , Zhihui Hao 1, Zhanhui Wang 1,2, Shusheng Tang 1,2, Yang Wang 1,2, Jianzhong Shen 1,2 and Chongshan Dai 1,2, *

2.8. Quantitative RT-PCR

The total RNA isolations were carried our using a Total RNA Isolation Kit (Vazyme Biotech Co., Ltd., Nanjing, China), according to the instructions.A Nanodrop reader (Therma Fisher, Waltham, MA, USA) was used to assess the quality of isolated RNAs and the optical density (OD) values at 260/280 nm among 1.9~2.1 were considered further. cDNAs were synthesized using a Prime Script RT-PCR kit (Takara, Beijing, China). The detail primer information is shown in **Suppl. Table S1**. The RT-PCR was performed by using an AB7500 real-time PCR instrument (Applied Biosystems, Waltham, MA, USA). β-actin was as the internal control gene and 2−ΔΔCt method was used to calculate the mRNA expression of each target gene.

Suppl. Tables

**Table S1**. The primer sequences of quantitative RT-PCR.

| **Gene name** | **Gene accession number** | **Direction** | | **Primer sequence (5′to 3′)** |
| --- | --- | --- | --- | --- |
| IL-1β | NM_008361 | | Forward  Reverse | 5′- TGGACCTTCCAGGATGAGGACA -3′  5′- GTTCATCTCGGAGCCTGTAGTG -3′ |
| IL-6 | NM_031168 | | Forward  Reverse | 5′- TACCACTTCACAAGTCGGAGGC -3′  5′- CTGCAAGTGCATCATCGTTGTTC -3′ |
| TNF-α | NM_001278601 | | Forward  Reverse | 5′- GGTGCCTATGTCTCAGCCTCTT -3′  5′- GCCATAGAACTGATGAGAGGGAG -3′ |
| Nrf2 | NM_010902 | | Forward  Reverse | 5′- CAGCATAGAGCAGGACATGGAG -3′  5′- GAACAGCGGTAGTATCAGCCAG -3′ |
| HO-1 | NM_010442 | | Forward  Reverse | 5′- CACTCTGGAGATGACACCTGAG -3′  5′- GTGTTCCTCTGTCAGCATCACC -3′ |
| NF-kB | NM_008689 | | Forward  Reverse | 5′- GCTGCCAAAGAAGGACACGACA -3′  5′-GGCAGGCTATTGCTCATCACAG -3′ |
| β-actin | NM_007393 | | Forward  Reverse | 5′- CATTGCTGACAGGATGCAGAAGG -3′  5′- TGCTGGAAGGTGGACAGTGAGG -3′ |
